# Supplementary material for: Deoxynucleoside Salvage in Fission Yeast Allows Rescue of Ribonucleotide Reductase Deficiency but Not Spd1-Mediated Inhibition of Replication
Source: PubMed Central journal article supplement (PMC5448002; doi:10.3390/genes8050128), 2017-04-25
Supplement: genes-08-00128-s001.pdf [file genes-08-00128-s001.pdf]

**Table S1.** List of strains used in this study.

---

|        |                                                                                                                                            |
|--------|--------------------------------------------------------------------------------------------------------------------------------------------|
| EA1    | <i>h<sup>-</sup> Δddb1::kanMX ura4::adh::dmdNK-natMX-adh::hENT1 ura4-aim</i>                                                               |
| EA5    | <i>h<sup>-</sup> Δspd1::hphMX ura4::adh::dmdNK-nat-adh::hENT1 ura4-aim</i>                                                                 |
| EA7    | <i>h<sup>-</sup> Δddb1::kanMX Δspd1::hphMX ura4::adh::dmdNK-natMX-adh::hENT1 ura4-aim</i>                                                  |
| Eg545  | <i>h<sup>+</sup> Δmat2,3</i>                                                                                                               |
| Eg2261 | <i>h<sup>+</sup> Δcdt2::ura4<sup>+</sup> ura4-D18 leu1-32 ade6-704</i>                                                                     |
| Eg2352 | <i>h<sup>-</sup> leu1-32 ura4-D18</i>                                                                                                      |
| Eg2664 | <i>h<sup>+</sup> cdc22-M45</i>                                                                                                             |
| Eg2686 | <i>h<sup>+</sup> rad3-TS</i>                                                                                                               |
| Eg3027 | <i>h<sup>-</sup> leu1<sup>+</sup>::nmt41-cdt2 Δcdt2::ura4<sup>+</sup> ura4-D18</i>                                                         |
| Eg3055 | <i>h<sup>+</sup> leu1<sup>+</sup>::nmt41-cdt2 Δcdt2::ura4<sup>+</sup> ura4-D18</i>                                                         |
| Eg3056 | <i>h<sup>-</sup> leu1<sup>+</sup>::nmt41-cdt2 Δcdt2::ura4<sup>+</sup> ura4-D18 rad3-TS</i>                                                 |
| Eg3178 | <i>h<sup>+</sup> leu1<sup>+</sup>::nmt41-cdt2 Δcdt2::ura4<sup>+</sup> ura4-D18</i>                                                         |
| Eg3188 | <i>h<sup>-</sup> leu1<sup>+</sup>::nmt41-cdt2 Δcdt2::ura4<sup>+</sup> ura4::adh-dmdNK-natMX-adh-hENT</i>                                   |
| Eg3192 | <i>h<sup>-</sup> leu1<sup>+</sup>::nmt41-cdt2 Δcdt2::ura4<sup>+</sup> ura4::adh-dmdNK-natMX-adh-hENT Δspd1::hphMX</i>                      |
| Eg3194 | <i>h<sup>-</sup> leu1<sup>+</sup>::nmt41-cdt2 Δcdt2::ura4<sup>+</sup> ura4-D18 Δspd1::hphMX</i>                                            |
| Eg3302 | <i>h<sup>-</sup> cdc22-C11</i>                                                                                                             |
| Eg3439 | <i>h<sup>-</sup> leu1<sup>+</sup>::nmt41-cdt2 Δcdt2::ura4<sup>+</sup> ura4-D18 Δspd1::hphMX rad3-TS</i>                                    |
| Eg3455 | <i>h<sup>-</sup> leu1<sup>+</sup>::nmt41-cdt2 Δcdt2::ura4<sup>+</sup> Δspd2::kanMX</i>                                                     |
| Eg3457 | <i>h<sup>-</sup> leu1<sup>+</sup>::nmt41-cdt2 Δcdt2::ura4<sup>+</sup> Δspd1::hphMX</i>                                                     |
| Eg3459 | <i>h<sup>-</sup> leu1<sup>+</sup>::nmt41-cdt2 Δcdt2::ura4<sup>+</sup> Δspd1::hphMX Δspd2::kanMX</i>                                        |
| Eg3490 | <i>h<sup>-</sup> leu1<sup>+</sup>::nmt41-cdt2 Δcdt2::ura4<sup>+</sup></i>                                                                  |
| Eg3503 | <i>h<sup>-</sup> cdc22-M45 ura4::adh-dmdNK-naMXt-adh-hENT ura4-aim</i>                                                                     |
| Eg3504 | <i>h<sup>-</sup> cdc22-C11 ura4::adh-dmdNK-natMX-adh-hENT ura4-aim</i>                                                                     |
| Eg3682 | <i>h<sup>-</sup> leu1<sup>+</sup>::nmt41-cdt2 Δcdt2::kanMX ura4::adh-dmdNK-natMX-adh-hENT cds1-2HA-his6::ura4<sup>+</sup></i>              |
| Eg3683 | <i>h<sup>-</sup> leu1<sup>+</sup>::nmt41-cdt2 Δcdt2::kanMX ura4::adh-dmdNK-natMX-adh-hENT cds1-2HA-his6::ura4<sup>+</sup> Δspd1::hphMX</i> |
| Eg3706 | <i>h<sup>-</sup> leu1<sup>+</sup>::nmt41-cdt2 Δcdt2::kanMX Δrad3::ura4<sup>+</sup> ura4-D18::adh-suc22<sup>+</sup></i>                     |
| Eg3775 | <i>h<sup>-</sup> leu1<sup>+</sup>::nmt41-cdt2 Δcdt2::ura4<sup>+</sup> ura4::adh-dmdNK-natMX-adh-hENT rad3-N2235K</i>                       |
| Eg3776 | <i>h<sup>-</sup> leu1<sup>+</sup>::nmt41-cdt2 Δcdt2::ura4<sup>+</sup> ura4::adh-dmdNK-natMX-adh-hENT rad3-N2235K Δspd1::hphMX</i>          |
| Eg3787 | <i>h<sup>+</sup> rad3-N2235K leu1<sup>+</sup>::nmt41-cdt2 Δcdt2::ura4<sup>+</sup></i>                                                      |
| Eg3788 | <i>h<sup>+</sup> rad3-N2235K leu1<sup>+</sup>::nmt41-cdt2 Δcdt2::ura4<sup>+</sup> Δspd1::hphMX</i>                                         |
| Eg3837 | <i>h<sup>-</sup> leu1<sup>+</sup>::nmt41-cdt2 Δcdt2::kanMX ura4-D18 Δrad3::ura4<sup>+</sup></i>                                            |
| Eg3838 | <i>h<sup>-</sup> leu1<sup>+</sup>::nmt41-cdt2 Δcdt2::kanMX ura4-D18 Δrad3::ura4<sup>+</sup> Δspd1::hphMX</i>                               |
| Eg3843 | <i>h<sup>-</sup> leu1<sup>+</sup>::nmt41-cdt2 Δcdt2::kanMX ura4-D18 Δrad26::ura4<sup>+</sup></i>                                           |
| Eg3844 | <i>h<sup>-</sup> leu1<sup>+</sup>::nmt41-cdt2 Δcdt2::kanMX ura4-D18 Δrad26::ura4<sup>+</sup> Δspd1::hphMX</i>                              |
| Eg3845 | <i>h<sup>-</sup> leu1<sup>+</sup>::nmt41-cdt2 Δcdt2::kanMX ura4-D18 Δcds1::ura4<sup>+</sup></i>                                            |
| Eg3846 | <i>h<sup>-</sup> leu1<sup>+</sup>::nmt41-cdt2 Δcdt2::kanMX ura4-D18 Δcds1::ura4<sup>+</sup> Δspd1::hphMX</i>                               |
| Eg3847 | <i>h<sup>-</sup> leu1<sup>+</sup>::nmt41-cdt2 Δcdt2::kanMX ura4-D18 Δmrc1::ura4<sup>+</sup></i>                                            |
| Eg3848 | <i>h<sup>-</sup> leu1<sup>+</sup>::nmt41-cdt2 Δcdt2::kanMX ura4-D18 Δmrc1::ura4<sup>+</sup> Δspd1::hphMX</i>                               |
| Eg3858 | <i>h<sup>2</sup> leu1<sup>+</sup>::nmt41-cdt2 Δcdt2::kanMX Δchk1::ura4<sup>+</sup></i>                                                     |
| Eg3859 | <i>h<sup>2</sup> leu1<sup>+</sup>::nmt41-cdt2 Δcdt2::kanMX Δchk1::ura4<sup>+</sup> Δspd1::natMK</i>                                        |
| Eg3851 | <i>h<sup>+</sup> leu1<sup>+</sup>::nmt41-cdt2 Δcdt2::kanMX ura4-D18 Δcrb2::ura4<sup>+</sup></i>                                            |
| Eg3852 | <i>h<sup>+</sup> leu1<sup>+</sup>::nmt41-cdt2 Δcdt2::kanMX ura4-D18 Δcrb2::ura4<sup>+</sup> Δspd1::hphMX</i>                               |
| Eg3860 | <i>h<sup>2</sup> leu1<sup>+</sup>::nmt41-cdt2 Δcdt2::kanMX Δchk1::ura4<sup>+</sup> Δcds1::hphMX</i>                                        |
| Eg3861 | <i>h<sup>2</sup> leu1<sup>+</sup>::nmt41-cdt2 Δcdt2::kanMX Δchk1::ura4<sup>+</sup> Δcds1::hphMX Δspd1::natMX</i>                           |
| Eg3835 | <i>h<sup>+</sup> leu1<sup>+</sup>::nmt41-cdt2 Δcdt2::kanMX ura4-D18 Δrad1::ura4<sup>+</sup></i>                                            |
| Eg3836 | <i>h<sup>+</sup> leu1<sup>+</sup>::nmt41-cdt2 Δcdt2::kanMX ura4-D18 Δrad1::ura4<sup>+</sup> Δspd1::hphMX</i>                               |
| Eg3849 | <i>h<sup>+</sup> leu1<sup>+</sup>::nmt41-cdt2 Δcdt2::kanMX ura4-D18 Δrad9::ura4<sup>+</sup></i>                                            |
| Eg3850 | <i>h<sup>+</sup> leu1<sup>+</sup>::nmt41-cdt2 Δcdt2::kanMX ura4-D18 Δrad9::ura4<sup>+</sup> Δspd1::hphMX</i>                               |
| Eg3839 | <i>h<sup>+</sup> leu1<sup>+</sup>::nmt41-cdt2 Δcdt2::kanMX ura4-D18 Δrad17::ura4<sup>+</sup></i>                                           |
| Eg3840 | <i>h<sup>+</sup> leu1<sup>+</sup>::nmt41-cdt2 Δcdt2::kanMX ura4-D18 Δrad17::ura4<sup>+</sup> Δspd1::hphMX</i>                              |
| MG83   | <i>h<sup>-</sup> ura4::adh::dmdNK-natMX-adh::hENT1 ura4-aim</i>                                                                            |
| OL1144 | <i>h<sup>-</sup> Δspd1::ura4 ura4-D18</i>                                                                                                  |
| OL1368 | <i>h<sup>+</sup> Δddb1::kanMX Δspd1::hphMX</i>                                                                                             |
| OL1687 | <i>h<sup>+</sup> Δddb1::hphMX</i>                                                                                                          |
| RO144  | <i>h<sup>-</sup> smt-0</i>                                                                                                                 |

---
